# Supplementary material for: Pickering emulsions stabilized with differently charged particles
Source: Royal Society of Chemistry journal article supplement (doi:10.1039/d3sm00305a), 2023-01-01
Supplement: d3sm00305a1.pdf [file d3sm00305a1.pdf]

## S12. SEM pictures of the particles

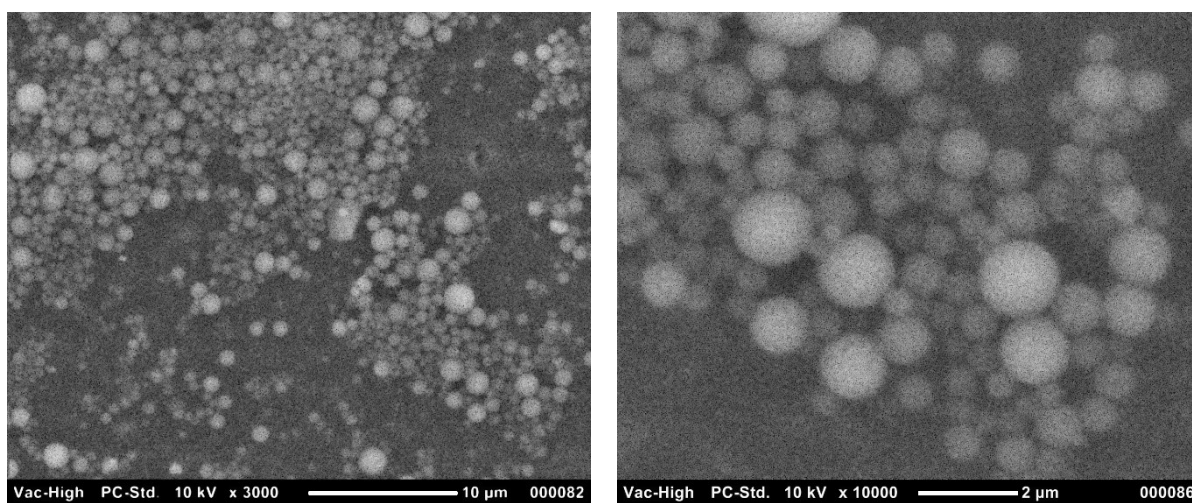

**Figure S2.** SEM images of a-PMMA at x3 000 (left) and x10 000 (right) magnification. Similar shapes were obtained for the other types of particles.

## S13. Aspect of the emulsions

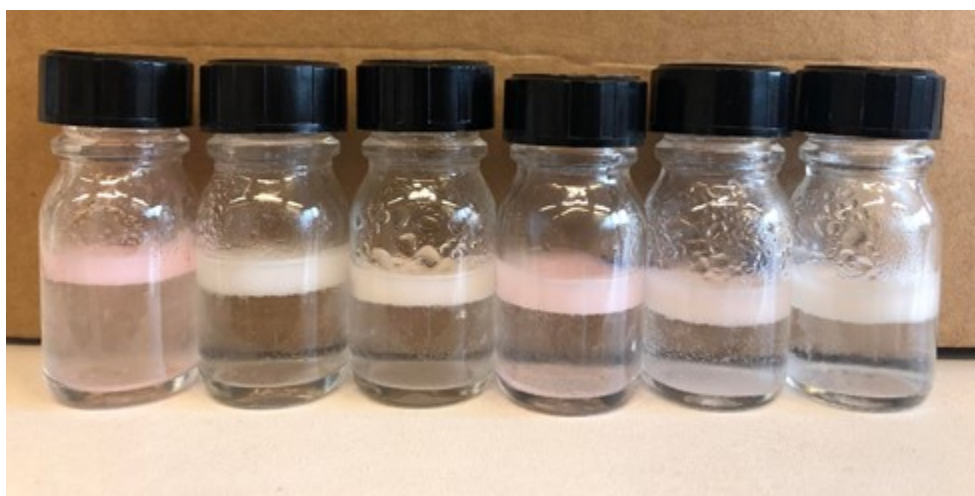

**Figure S3.** Pickering emulsions made with 25 mg of particles per  $\text{cm}^3$  of oil. From left to right N-, A-, C-, A/N-, N/C- and A/C-emulsions. The picture was taken 4 months after the preparation of emulsions. No release of free oil was observed on top of the emulsions.

#### SI4. Droplets diameters measurements for A-emulsions

To obtain the area of non-spherical droplets of various shapes, a mean (effective) diameter  $d_m$  was measured diagonally with respect to the directions of the long and short dimensions in the droplets.

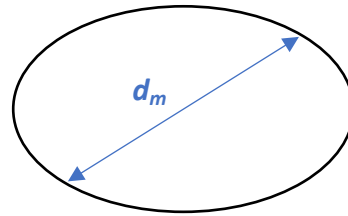

This diameter was then used as the apparent diameter of spherical droplets. So as to ensure that no systematic errors have been introduced by using  $d_m$ , the cross-section area of several non-spherical droplets from different emulsions were manually measured (using Image J) and compared with the spherical cross-section area calculated from  $d_m$ . The results are shown in the next tables for three A-emulsions. The absolute errors were always below 10% and the errors tend to compensate one another. Finally, the mean values of the cross-sectional areas calculated from  $d_m$  were close to the real ones (absolute errors below 5%), and less than the standard deviations of the diameters measurements for spherical droplets (9%).

| Emulsion 1  | Measured "diameter" ( $\mu\text{m}$ ) | Manually measured area ( $\mu\text{m}^2$ ) | Area calculated from the diameter ( $\mu\text{m}^2$ ) | Error (%) |
|-------------|---------------------------------------|--------------------------------------------|-------------------------------------------------------|-----------|
|             | 132                                   | 14083                                      | 13682                                                 | -3%       |
|             | 164                                   | 18372                                      | 21124                                                 | 15%       |
|             | 93                                    | 6879                                       | 6793                                                  | -1%       |
|             | 105                                   | 8556                                       | 8659                                                  | 1%        |
|             | 131                                   | 13640                                      | 13478                                                 | -1%       |
|             | 104                                   | 8756                                       | 8495                                                  | -3%       |
|             | 125                                   | 12066                                      | 12272                                                 | 2%        |
|             | 151                                   | 18945                                      | 17908                                                 | -5%       |
| <b>Mean</b> | <b>126</b>                            | <b>12662</b>                               | <b>12801</b>                                          | <b>1%</b> |

| Emulsion 2  | Measured "diameter" ( $\mu\text{m}$ ) | Manually measured area ( $\mu\text{m}^2$ ) | Area calculated from the diameter ( $\mu\text{m}^2$ ) | Error (%) |
|-------------|---------------------------------------|--------------------------------------------|-------------------------------------------------------|-----------|
|             | 135                                   | 13521                                      | 14314                                                 | 6%        |
|             | 169                                   | 20330                                      | 22432                                                 | 10%       |
|             | 125                                   | 13483                                      | 12272                                                 | -9%       |
|             | 155                                   | 15911                                      | 18869                                                 | 19%       |
|             | 149                                   | 17572                                      | 17437                                                 | -1%       |
|             | 139                                   | 12845                                      | 15175                                                 | 18%       |
|             | 135                                   | 16333                                      | 14314                                                 | -12%      |
|             | 133                                   | 13440                                      | 13893                                                 | 3%        |
| <b>Mean</b> | <b>143</b>                            | <b>15429</b>                               | <b>16088</b>                                          | <b>4%</b> |

| Emulsion 3  | Measured "diameter" ( $\mu\text{m}$ ) | Manually measured area ( $\mu\text{m}^2$ ) | Area calculated from the diameter ( $\mu\text{m}^2$ ) | Error (%)  |
|-------------|---------------------------------------|--------------------------------------------|-------------------------------------------------------|------------|
|             | 152                                   | 16858                                      | 18146                                                 | 8%         |
|             | 132                                   | 14954                                      | 13685                                                 | -8%        |
|             | 170                                   | 25100                                      | 22698                                                 | -10%       |
|             | 152                                   | 21363                                      | 18146                                                 | -15%       |
|             | 183                                   | 24397                                      | 26302                                                 | 8%         |
|             | 176                                   | 23 597                                     | 24328                                                 | 3%         |
|             | 160                                   | 20562                                      | 20106                                                 | -2%        |
|             | 142                                   | 19292                                      | 15837                                                 | -18%       |
| <b>Mean</b> | <b>158</b>                            | <b>20765</b>                               | <b>19906</b>                                          | <b>-4%</b> |

### S15. Simulation of a superimposition of particles in a CLSM picture

Two pictures of A-emulsion droplets colored in blue and in red were merged with Image J to simulate the superimposition of differently colored particles of a DCP emulsion caused by their adsorption as multilayers. The result of the stacking of both blue and red dots is a purple color of the droplets.

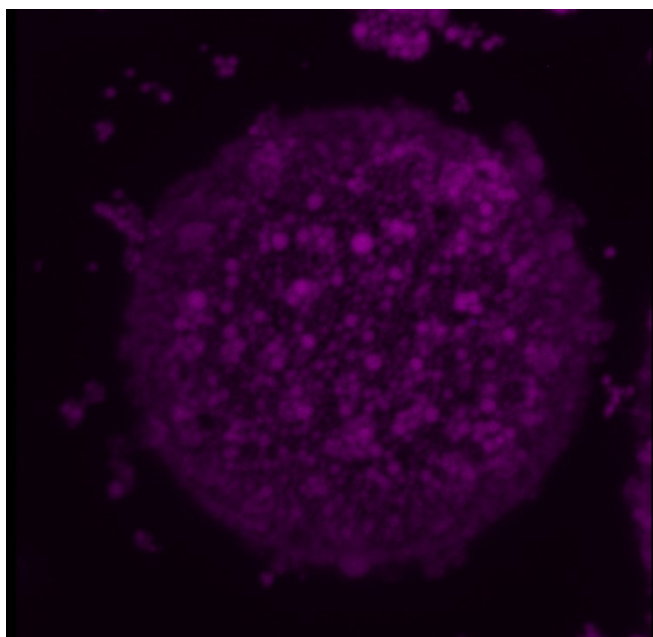

**Figure S5.** Merging of the same images colored in blue and in red. The superimposition of the particles with themselves appears as purple.
